# Supplementary material
Source: PubMed Central journal article supplement (PMC4104481)
Supplement: NIHMS611152-supplement-Supplementary_Material.pdf [file NIHMS611152-supplement-Supplementary_Material.pdf]

## Supplementary material

Figure 1

Low CS individual (2533)

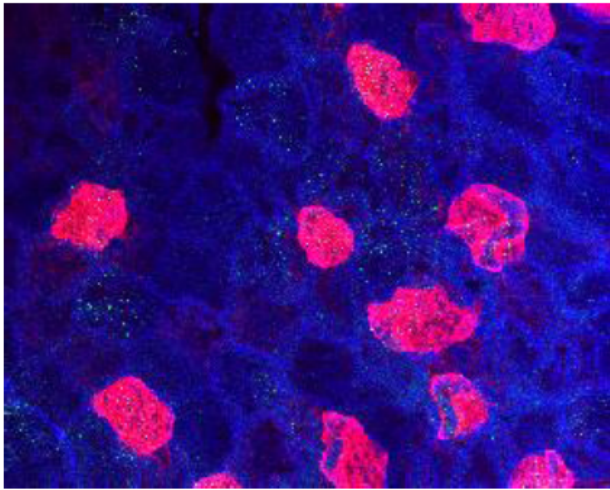

High CS individual (7293)

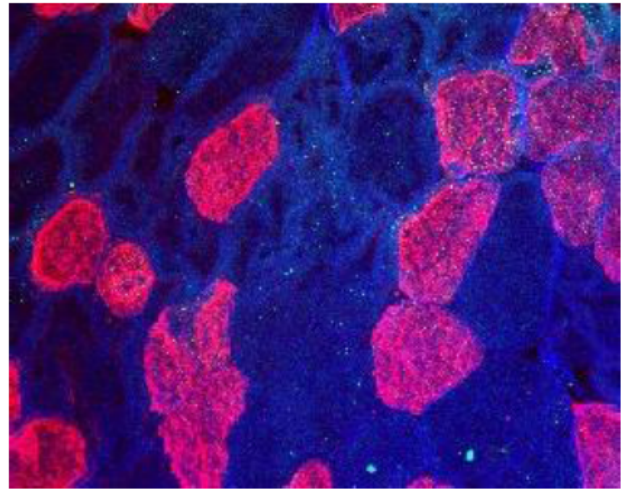

Representative images of fiber typing and intramyocellular lipid measured in one low- and one high-muscle citrate synthase activity subjects. Technical details in Methods section. Fiber type I (red), intramyocellular lipid (green) and laminin (blue).
